# Supplementary material for: Salvage Surgical Resection After Linac-based Stereotactic Radiosurgery and Radiotherapy for Newly Diagnosed Brain Metastasis
Source: Research Square preprint supplement (doi:10.21203/rs.3.rs-272644/v1), 2021-03-06
Supplement: Supplementary file 1 [file 44f825273ed4f662e1d22543.docx]

Table 3: Summary of cyst formation after stereotactic radiosurgery and fractionated stereotactic radiotherapy

| Author  (year) | Modality | Number of patients | Time to  cyst formation | Treatment | prognosis |
| --- | --- | --- | --- | --- | --- |
| Ishikawa  (2009 ) | GK | 8 | 53 months  (median) | 5 cases: Ommaya reservoir  2 cases: reject  1 case: asymptomatic | 5 cases: alive  2 cases: died  (progressive cyst formation)  1 case: died with primary cancer |
| Yamamoto  (2012) | GK | 7 | 53 months  (median) | 7 cases: Ommaya reservoir | NA |
| Aizawa  (2018) | Linac-based  SRS | 1 | 123 months | 1 case: Ommaya reservoir | alive |
| Alattar  (2019) | Linac-based  SRS/fSRT | 11 | 218 days | 2 cases: asymptomatic  3 cases: steroid  4 cases: surgical fenestration | alive |
| This study (2021) | Linac-based  SRS/fSRT | 2 | 85 months  and 96 months | 2 cases: surgical fenestration | alive |

GK: Gamma Knife, SRS/fSRT: stereotactic radiosurgery and fractionated stereotactic radiotherapy, NA: not available
